32. Murdock AD, Berséus O, Hervig T, Strandenes G, Lunde TH: Whole blood: The future of traumatic hemorrhagic shock resuscitation. *Shock* 2014; 41 Suppl 1:62–9

33. Bahr MP, Yazer MH, Triulzi DJ, Collins RA: Whole blood for the acutely haemorrhaging civilian trauma patient: a novel idea or rediscovery? *Transfus Med* 2016; 26:406–14

## Appendix

### Members of the AABB/THOR Working Party

Col. Andrew Cap, M.D., Ph.D. (U.S. Army Institute of Surgical Research, San Antonio, Texas); Capt. Roland L. Fahie, Sr, M.S.C., U.S.N. (U.S. Armed Services Blood Program, Washington, DC) Emmett Gourdine, C.L.S., C.M.Q./Q.E, C.Q.A.(A.S.Q.), M.A., M.S. (AABB, Bethesda, Maryland); Donald H. Jenkins, M.D., F.A.C.S. (Department of Surgery, Division of Trauma and Emergency Surgery, University of Texas San Antonio, San Antonio, Texas); Steven Kleinman, M.D. (AABB, Bethesda, Maryland); Ernest E.

Moore, M.D. (Department of Surgery, University of Colorado, Denver, Colorado); Paul Ness, M.D. (Johns Hopkins University School of Medicine, Baltimore, Maryland); Eilat Shinar, M.D. (Magen David Adom National Blood Services, Ramat Gan, Israel); Steve R. Sloan, M.D., Ph.D. (Department of Laboratory Medicine, Boston Children's Hospital, Boston, Massachusetts); James R. Stubbs, M.D. (Department of Laboratory Medicine and Pathology, Mayo Clinic, Rochester, Minnesota); Kevin R. Ward, M.D. (Department of Emergency Medicine, Michigan Center for Integrative Research in Critical Care, University of Michigan, Ann Arbor, Michigan).

## ANESTHESIOLOGY REFLECTIONS FROM THE WOOD LIBRARY-MUSEUM

### “Frozen Air” Anesthetics in St. Louis by Columbia Dental Parlors

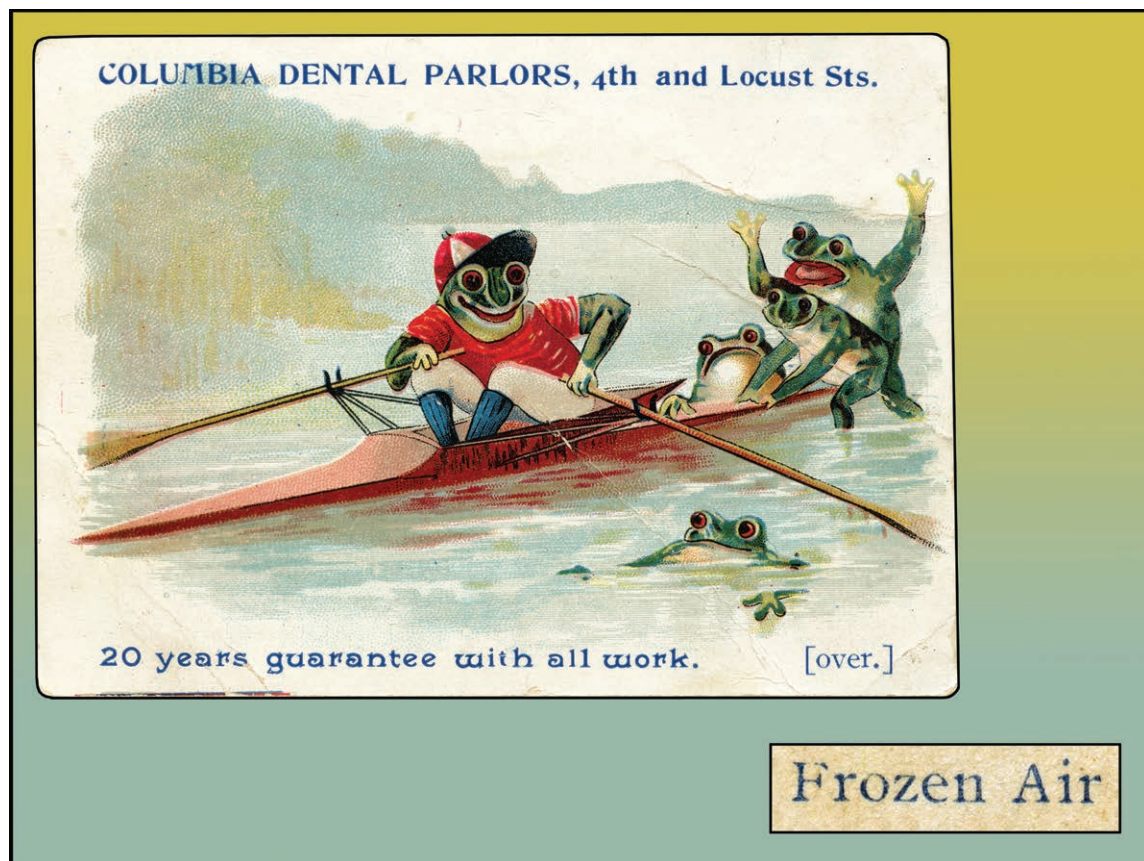

In the wake of the 1893 World Columbian Exposition, a number of “Columbia” Dental Parlors sprung up around the United States. The trade card from one of these parlors depicts four frogs assisting a fifth in rowing a single scull (*top*). The back of the card locates the parlors in the “Trust Building” at “4th and Locust” Streets, which apparently references a former St. Louis Trust Company Building in St. Louis, Missouri. Also on the reverse of this card is a reference to anesthesia with “Frozen Air” (*bottom*). From ether spray to ethyl chloride (and eventually to Somnoform), a variety of vapocoolant sprays were used topically to provide chilling anesthesia for dental and minor surgical cases. (Copyright © the American Society of Anesthesiologists’ Wood Library-Museum of Anesthesiology.)

George S. Bause, M.D., M.P.H., *Honorary Curator and Laureate of the History of Anesthesia, Wood Library-Museum of Anesthesiology, Schaumburg, Illinois, and Clinical Associate Professor, Case Western Reserve University, Cleveland, Ohio.* UJYC@aol.com.
